# Supplementary material
Source: publisher site journal article supplement (https://www.dovepress.com/article/272757)
Supplement: Supplementary file 1 [file get_supplementary_file.php]

**Supplemental Table 1. Differences of STAT gene expression in ONCOMINE datasets.**

| Gene | AML vs. normal | Fold change | T-TEST | P-vaule | Ref | PMID |
| --- | --- | --- | --- | --- | --- | --- |
| STAT1 | Chronic Lymphocytic Leukemia vs. Normal | 3.591 | 9.189 | 8.74E-8 | Haslinger Leukemia | [15459216](https://www.ncbi.nlm.nih.gov/pubmed/15459216) |
|  | Chronic Lymphocytic Leukemia vs. Normal | 3.509 | 6.829 | 4.05E-4 | Rosenwald Lymphoma | 12075054 |
|  | B-Cell Childhood Acute lymphoblastic Leukemia vs. Normal | 1.903 | 5.347 | 0.003 | Coustan-Smith Leukemia | 21487112 |
|  | T-Cell Childhood Acute lymphoblastic Leukemia vs. Normal | 2.033 | 4.821 | 5.44E-4 | Coustan-Smith Leukemia | 21487112 |
|  | Chronic Lymphocytic Leukemia vs. Normal | 1.762 | 3.587 | 3.93E-4 | Basso Lymphoma | 15778709 |
|  | Myelodysplastic Syndrome vs.Normal | 1.113 | 2.069 | 0.02 | Haferlach Leukemia | 20406941 |
| STAT2 | Chronic Lymphocytic Leukemia vs. Normal | 1.284 | 5.362 | 8.35E-7 | Basso Lymphoma | 15778709 |
|  | Chronic Lymphocytic Leukemia vs. Normal | 1.226 | 2.136 | 0.021 | Alizadeh Lymphoma | 10676951 |
|  | Chronic Lymphocytic Leukemia vs. Normal | 1.928 | 2.978 | 0.032 | Rosenwald Lymphoma | 12075054 |
|  | Chronic Lymphocytic Leukemia vs. Normal | 3.672 | 5.447 | 5.6E-5 | Haslinger Leukemia | 15459216 |
|  | Acute Myeloid Leukemia vs. Normal | 1.169 | 2.624 | 0.015 | Valk Leukemia | 15084694 |
|  | Chronic Lymphocytic Leukemia vs. Normal | 1.625 | 9.617 | 2.03E-16 | Haferlach Leukemia | 20406941 |
|  | Myelodysplastic Syndrome vs.Normal | 1.866 | 1.866 | 0.032 | Haferlach Leukemia | 20406941 |
|  | B-Cell Acute lymphoblastic Leukemia vs. Normal | 1.282 | 4.363 | 1.18E-5 | Haferlach Leukemia | 20406941 |
|  | B-Cell Childhood Acute lymphoblastic Leukemia vs. Normal | 1.212 | 3.828 | 1.11E-4 | Haferlach Leukemia | 20406941 |
|  | Acute Myeloid Leukemia vs. Normal | 1.171 | 3.239 | 8.31E-4 | Haferlach Leukemia | 20406941 |
|  | Pro-B Acute lymphoblastic Leukemia vs. Normal | 1.197 | 2.745 | 0.003 | Haferlach Leukemia | 20406941 |
|  | T-Cell Acute lymphoblastic Leukemia vs. Normal | 1.032 | 1.994 | 0.024 | Haferlach Leukemia | 20406941 |
|  | Acute Myeloid Leukemia vs. Normal | 1.339 | 2.224 | 0.018 | Andersson Leukemia | 17410181 |
| STAT3 | Chronic Lymphocytic Leukemia vs. Normal | 1.887 | 7.99 | 4.9E-8 | Haslinger Leukemia | [15459216](https://www.ncbi.nlm.nih.gov/pubmed/15459216) |
|  | T-Cell Acute lymphoblastic Leukemia vs. Normal | 1.871 | 6.014 | 4.53E-7 | Coustan-Smith Leukemia | 21487112 |
|  | Acute Myeloid Leukemia vs. Normal | 1.15 | 2.236 | 0.027 | Valk Leukemia | 15084694 |
|  | Chronic Lymphocytic Leukemia vs. Normal | 1.104 | 2.235 | 0.013 | Haferlach Leukemia | 20406941 |
| STAT4 | Hairy Cell Leukemia vs. Normal | 1.667 | 2.948 | 0.004 | Basso Lymphoma | 15778709 |
|  | T-Cell Childhood Acute lymphoblastic Leukemia vs. Normal | 1.729 | 3.446 | 0.009 | Coustan-Smith Leukemia | 21487112 |
| STAT5A | T-Cell Childhood Acute lymphoblastic Leukemia vs. Normal | 3.268 | 13.797 | 4.66E-8 | Coustan-Smith Leukemia | 21487112 |
|  | T-Cell Childhood Acute lymphoblastic Leukemia vs. Normal | 1.624 | 10.007 | 3.33E-20 | Haferlach Leukemia | 20406941 |
|  | Acute Myeloid Leukemia vs. Normal | 1.295 | 2.465 | 0.01 | Andersson Leukemia | 17410181 |
|  | T-Cell Childhood Acute lymphoblastic Leukemia vs. Normal | 1.518 | 2.271 | 0.022 | Andersson Leukemia | 17410181 |
| STAT5B | T-Cell Childhood Acute lymphoblastic Leukemia vs. Normal | 1.606 | 5.697 | 9.92E-6 | Coustan-Smith Leukemia | 21487112 |
|  | Chronic Lymphocytic Leukemia vs. Normal | 1.686 | 1.934 | 0.043 | Rosenwald Lymphoma | 12075054 |
|  | Chronic Adult T-cell Leukemia/Lymphoma vs.Normal | 1.367 | 2.547 | 0.01 | Choi Leukemia | 16909099 |
|  | Chronic Adult T-cell Leukemia/Lymphoma vs.Normal | 1.182 | 1.876 | 0.036 | Maia Leukemia | 16267031 |
|  | T-Cell Acute lymphoblastic Leukemia vs. Normal | 1.941 | 5.824 | 1.83E-5 | Andersson Leukemia | 17410181 |
|  | B-Cell Acute lymphoblastic Leukemia vs. Normal | 1.841 | 7.007 | 1.47E-5 | Andersson Leukemia | 17410181 |
|  | Acute Myeloid Leukemia vs. Normal | 1.428 | 3.516 | 0.001 | Andersson Leukemia | 17410181 |
|  | Chronic Lymphocytic Leukemia vs. Normal | 1.989 | 3.403 | 0.003 | Haslinger Leukemia | [15459216](https://www.ncbi.nlm.nih.gov/pubmed/15459216) |
|  | T-Cell Acute lymphoblastic Leukemia vs. Normal | 1.226 | 5.218 | 2.44E-7 | Haferlach Leukemia | 20406941 |
|  | Chronic Myelogenous Leukemia vs.Normal | 1.089 | 2.133 | 0.017 | Haferlach Leukemia | 20406941 |
| STAT6 | Chronic Lymphocytic Leukemia vs. Normal | 1.857 | 6.049 | 6.74E-6 | Haslinger Leukemia | [15459216](https://www.ncbi.nlm.nih.gov/pubmed/15459216) |
|  | Chronic Lymphocytic Leukemia vs. Normal | 1.526 | 3.629 | 0.002 | Rosenwald Lymphoma | 12075054 |
|  | Chronic Adult T-cell Leukemia/Lymphoma vs.Normal | 1.619 | 3.401 | 0.003 | Choi Leukemia | 16909099 |
|  | Adult T-cell Leukemia/Lymphoma vs.Normal | 1.456 | 2.399 | 0.015 | Choi Leukemia | 16909099 |
|  | Acute Myeloid Leukemia vs. Normal | 1.4429 | 4.597 | 7.09E-4 | Valk Leukemia | 15084694 |
|  | T-Cell Childhood Acute lymphoblastic Leukemia vs. Normal | 1.474 | 4.863 | 3.0E-4 | Coustan-Smith Leukemia | 21487112 |
|  | B-Cell Childhood Acute lymphoblastic Leukemia vs. Normal | 1.25 | 3.603 | 0.012 | Coustan-Smith Leukemia | 21487112 |
|  | T-Cell Prolymphocytic Leukemia vs.Normal | 1.547 | 1.941 | 0.038 | Druig Leukemia | 17713554 |
|  | Chronic Lymphocytic Leukemia vs. Normal | 1.148 | 1.928 | 0.029 | Basso Lymphoma | 15778709 |
|  | Chronic Lymphocytic Leukemia vs. Normal | 1.913 | 15.051 | 6.91E-28 | Haferlach Leukemia | 20406941 |
|  | Pro-B Acute Lymphoblastic Leukemia vs. Normal | 1.488 | 7.863 | 5.11E-13 | Haferlach Leukemia | 20406941 |
|  | Acute Myeloid Leukemia vs. Normal | 1.265 | 5.433 | 1.85E-7 | Haferlach Leukemia | 20406941 |
|  | Chronic Myelogenous Leukemia vs.Normal | 1.111 | 1.919 | 0.028 | Haferlach Leukemia | 20406941 |

**Supplemental table 2: GO enrichment analysis of STATs in AML.**

| GO | Category | Description | Count | % | Log10(P) | Log10(q) |
| --- | --- | --- | --- | --- | --- | --- |
| GO:0019221 | GO Biological Processes | cytokine-mediated signaling pathway | 23 | 46.00 | -20.53 | -16.18 |
| GO:0018108 | GO Biological Processes | peptidyl-tyrosine phosphorylation | 15 | 30.00 | -15.31 | -11.60 |
| GO:0030099 | GO Biological Processes | myeloid cell differentiation | 14 | 28.00 | -13.03 | -9.46 |
| GO:0060337 | GO Biological Processes | type I interferon signaling pathway | 9 | 18.00 | -12.47 | -9.03 |
| GO:0007169 | GO Biological Processes | transmembrane receptor protein tyrosine kinase signaling pathway | 16 | 32.00 | -12.18 | -8.83 |
| GO:0002521 | GO Biological Processes | leukocyte differentiation | 14 | 28.00 | -11.79 | -8.49 |
| GO:0001816 | GO Biological Processes | cytokine production | 15 | 30.00 | -10.43 | -7.34 |
| GO:0043434 | GO Biological Processes | response to peptide hormone | 12 | 24.00 | -10.15 | -7.08 |
| GO:0002764 | GO Biological Processes | immune response-regulating signaling pathway | 13 | 26.00 | -9.09 | -6.20 |
| GO:0043303 | GO Biological Processes | mast cell degranulation | 5 | 10.00 | -7.21 | -4.71 |
| GO:0030335 | GO Biological Processes | positive regulation of cell migration | 10 | 20.00 | -6.85 | -4.41 |
| GO:0033674 | GO Biological Processes | positive regulation of kinase activity | 10 | 20.00 | -6.63 | -4.24 |
| GO:0046677 | GO Biological Processes | response to antibiotic | 8 | 16.00 | -6.46 | -4.10 |
| GO:1903532 | GO Biological Processes | positive regulation of secretion by cell | 8 | 16.00 | -5.81 | -3.54 |
| GO:0070848 | GO Biological Processes | response to growth factor | 10 | 20.00 | -5.64 | -3.39 |
| GO:0002573 | GO Biological Processes | myeloid leukocyte differentiation | 6 | 12.00 | -5.39 | -3.19 |
| GO:0003924 | GO Molecular Functions | GTPase activity | 7 | 14.00 | -5.35 | -3.16 |
| GO:0004672 | GO Molecular Functions | protein kinase activity | 14 | 28.00 | -10.89 | -7.74 |
| GO:0019903 | GO Molecular Functions | protein phosphatase binding | 8 | 16.00 | -9.34 | -6.42 |
| GO:0004707 | GO Molecular Functions | MAP kinase activity | 3 | 6.00 | -5.52 | -3.31 |

**Supplemental table 3: KEGG enrichment analysis of STATs in AML.**

| GO | Category | Description | Count | % | Log10(P) | Log10(q) |
| --- | --- | --- | --- | --- | --- | --- |
| hsa04658 | KEGG Pathway | Th1 and Th2 cell differentiation | 15 | 30.00 | -24.50 | -21.81 |
| hsa05162 | KEGG Pathway | Measles | 14 | 28.00 | -19.99 | -17.59 |
| hsa05160 | KEGG Pathway | Hepatitis C | 12 | 24.00 | -16.40 | -14.41 |
| hsa05200 | KEGG Pathway | Pathways in cancer | 15 | 30.00 | -14.78 | -12.94 |
| hsa04014 | KEGG Pathway | Ras signaling pathway | 12 | 24.00 | -13.50 | -11.76 |
| hsa05166 | KEGG Pathway | HTLV-I infection | 12 | 24.00 | -12.88 | -11.23 |
| hsa04664 | KEGG Pathway | Fc epsilon RI signaling pathway | 7 | 14.00 | -10.03 | -8.64 |
| hsa05203 | KEGG Pathway | Viral carcinogenesis | 9 | 18.00 | -9.53 | -8.19 |
| hsa05212 | KEGG Pathway | Pancreatic cancer | 5 | 10.00 | -6.67 | -5.55 |
| hsa04650 | KEGG Pathway | Natural killer cell mediated cytotoxicity | 6 | 12.00 | -6.49 | -5.41 |
| hsa04060 | KEGG Pathway | Cytokine-cytokine receptor interaction | 7 | 14.00 | -5.87 | -4.84 |
| hsa04144 | KEGG Pathway | Endocytosis | 6 | 12.00 | -4.80 | -3.86 |

**Supplemental Table 4: Characteristics of recruited AML patients.**

| **Patients’ characteristics** |  |
| --- | --- |
| **SEX** |  |
| Female | 45 |
| Male | 57 |
| No data | 3 |
| **Age** | 14-75 |
| No data | 3 |
| **FAB** |  |
| M1 | 3 |
| M2 | 30 |
| M3 | 10 |
| M4 | 3 |
| M5 | 19 |
| AML-MDS | 8 |
| AML | 19 |
| No data | 3 |
| WBC | 0.4-296 |
| Hb | 38-184 |
| PLT | 3-391 |
| PB blast | 0-95 |
| BM blast | 2.6-95.8 |
| No data | 3 |
| **Cytogenetics** |  |
| Normal | 41 |
| Complex | 8 |
| t(8;21) | 14 |
| t(15;17） | 10 |
| inv(16) | 7 |
| +8 | 3 |
| del(5) | 1 |
| Other | 14 |
| -Y | 2 |
| No data | 5 |
| **Mutations** |  |
| FLT3 | 13 |
| WT1 | 12 |
| DNMT3A | 5 |
| CEBPA | 12 |
| NPM1 | 10 |
| No data | 5 |

**Supplemental Table 5: Unicox and multicox regression analysis for variables for survival in recruited AML patients after chemotherapy.**

|  | unicox |  | multicox |  |
| --- | --- | --- | --- | --- |
|  | HR(95%CI) | P | HR(95%CI) | P |
| STAT6 | 3.223(1.42-7.313) | 0.005 | 4.429(1.561-12.571) | 0.005 |
| Age | 1.011(0.986-1.038) | 0.384 | 1.002(0.962-1.044) | 0.916 |
| WBC | 1.006(0.999-1.013) | 0.107 | 1.007(0.993-1.023) | 0.329 |
| Hb | 1.005(0.985-1.026) | 0.613 | 1.004(0.98-1.028) | 0.750 |
| PLT | 1.001(0.996-1.006) | 0.627 | 0.996(0.985-1.007) | 0.515 |
| PB _ Blast | 1.005(0.994-1.017) | 0.369 | 1(0.982-1.019) | 0.966 |
| BM _ Blast | 1.012(0.993-1.032) | 0.224 | 1.012(0.984-1.041) | 0.396 |
| RISK_CYTO Poor | 0.412(0.164-1.034) | 0.059 | 5.055(0.955-26.764) | 0.057 |
| FLT3 | 3.564(1.394-9.116) | 0.008 | 6.723(1.558-29.017) | 0.011 |
| WT1 | 0.206(0.028-1.523) | 0.122 | 0.006(0-0.293) | 0.010 |
| DNMT3A | 2.317(0.692-7.758) | 0.173 | 14.177(1.943-103.442) | 0.009 |
| CEBPA | 0.243(0.058-1.028) | 0.055 | 0.349(0.068-1.806) | 0.210 |
| NPM1 | 1.651(0.387-7.038) | 0.498 | 0.67(0.048-9.366) | 0.766 |
